# Supplementary material for: The effect of intravenous hyoscine butylbromide on slow progress in labor (BUSCLAB): A double-blind randomized placebo-controlled trial
Source: PubMed Central journal article supplement (PMC11008832; doi:10.1371/journal.pmed.1004352), 2024-03-28
Supplement: pmed.1004352.s001.pdf [file pmed.1004352.s001.pdf]

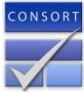

# CONSORT 2010 checklist of information to include when reporting a randomised trial\*

| Section/Topic             | Item No | Checklist item                                                                                                          | Reported on page No                                                                                                            |
|---------------------------|---------|-------------------------------------------------------------------------------------------------------------------------|--------------------------------------------------------------------------------------------------------------------------------|
| <b>Title and abstract</b> |         |                                                                                                                         |                                                                                                                                |
|                           | 1a      | Identification as a randomised trial in the title                                                                       | <u>Present in title</u>                                                                                                        |
|                           | 1b      | Structured summary of trial design, methods, results, and conclusions (for specific guidance see CONSORT for abstracts) | <u>Present in abstract</u>                                                                                                     |
| <b>Introduction</b>       |         |                                                                                                                         |                                                                                                                                |
| Background and objectives | 2a      | Scientific background and explanation of rationale                                                                      | <u>Section: Introduction, paragraph: 1-3</u>                                                                                   |
|                           | 2b      | Specific objectives or hypotheses                                                                                       | <u>Section: Introduction paragraph: 3-4</u>                                                                                    |
| <b>Methods</b>            |         |                                                                                                                         |                                                                                                                                |
| Trial design              | 3a      | Description of trial design (such as parallel, factorial) including allocation ratio                                    | <u>Section: Methods, subsection Study design Paragraph: 1-2 and in subsection Randomization and blinding in subparagraph 1</u> |
|                           | 3b      | Important changes to methods after trial commencement (such as eligibility criteria), with reasons                      | <u>No changes were made</u>                                                                                                    |

|               |    |                                                                                                                                       |                                                                                |
|---------------|----|---------------------------------------------------------------------------------------------------------------------------------------|--------------------------------------------------------------------------------|
| Participants  | 4a | Eligibility criteria for participants                                                                                                 | after start of trial                                                           |
|               | 4b | Settings and locations where the data were collected                                                                                  | Section: Methods Paragraph: 3, 4, 5 and 6                                      |
| Interventions | 5  | The interventions for each group with sufficient details to allow replication, including how and when they were actually administered | Section: Methods, subsection Randomization and blinding in paragraph 2-3       |
| Outcomes      | 6a | Completely defined pre-specified primary and secondary outcome measures, including how and when they were assessed                    | Section: Methods, subsection Outcomes Paragraph in subsection: 1-4             |
|               | 6b | Any changes to trial outcomes after the trial commenced, with reasons                                                                 | Not applicable                                                                 |
| Sample size   | 7a | How sample size was determined                                                                                                        | Section: Methods, subsection Sample size calculations. Subsection paragraph: 1 |
|               | 7b | When applicable, explanation of any interim analyses and stopping guidelines                                                          | Not applicable                                                                 |

|                                       |     |                                                                                                                                                                                             |                                                                                                                          |
|---------------------------------------|-----|---------------------------------------------------------------------------------------------------------------------------------------------------------------------------------------------|--------------------------------------------------------------------------------------------------------------------------|
| Randomisation:<br>Sequence generation | 8a  | Method used to generate the random allocation sequence                                                                                                                                      | Section:<br>Randomization and blinding<br>Paragraph: 1                                                                   |
|                                       | 8b  | Type of randomisation; details of any restriction (such as blocking and block size)                                                                                                         | Section:<br>Randomization and blinding<br>Paragraph: 1                                                                   |
| Allocation concealment mechanism      | 9   | Mechanism used to implement the random allocation sequence (such as sequentially numbered containers), describing any steps taken to conceal the sequence until interventions were assigned | Section:<br>Randomization and blinding<br>Paragraph: 1, 2 and 3                                                          |
| Implementation                        | 10  | Who generated the random allocation sequence, who enrolled participants, and who assigned participants to interventions                                                                     | Section:<br>Randomization and blinding<br>Paragraph: 1 and 2                                                             |
| Blinding                              | 11a | If done, who was blinded after assignment to interventions (for example, participants, care providers, those assessing outcomes) and how                                                    | Section:<br>Randomization and blinding<br>Paragraph: 3.<br>In addition in Abstract in paragraph of methods and findings. |
|                                       | 11b | If relevant, description of the similarity of interventions                                                                                                                                 | Not applicable                                                                                                           |
| Statistical methods                   | 12a | Statistical methods used to compare groups for primary and secondary outcomes                                                                                                               | Section:<br>Statistical analysis<br>Paragraph: 1-                                                                        |

|                                                      |     |                                                                                                                                                |                                                                                                                                                                                                                                              |
|------------------------------------------------------|-----|------------------------------------------------------------------------------------------------------------------------------------------------|----------------------------------------------------------------------------------------------------------------------------------------------------------------------------------------------------------------------------------------------|
|                                                      | 12b | Methods for additional analyses, such as subgroup analyses and adjusted analyses                                                               | 9<br>Section:<br>Methods,<br>subsection<br>analysis sets<br>and statistical<br>analysis.                                                                                                                                                     |
| <b>Results</b>                                       |     |                                                                                                                                                |                                                                                                                                                                                                                                              |
| Participant flow (a diagram is strongly recommended) | 13a | For each group, the numbers of participants who were randomly assigned, received intended treatment, and were analysed for the primary outcome | Fig2<br>CONSORT<br>Flow Diagram                                                                                                                                                                                                              |
|                                                      | 13b | For each group, losses and exclusions after randomisation, together with reasons                                                               | Fig2<br>CONSORT<br>Flow Diagram                                                                                                                                                                                                              |
| Recruitment                                          | 14a | Dates defining the periods of recruitment and follow-up                                                                                        | Section:<br>Methods,<br>subsection<br>participants.<br>subparagraph<br>: 1.<br>Additionally in<br>S2 Trial Flow<br>Diagram and<br>in Methods,<br>subsection<br>Procedures<br>following<br>treatment<br>administration<br>, paragraph 1-<br>3 |
|                                                      | 14b | Why the trial ended or was stopped                                                                                                             | Not applicable                                                                                                                                                                                                                               |
| Baseline data                                        | 15  | A table showing baseline demographic and clinical characteristics for each group                                                               | Table 1                                                                                                                                                                                                                                      |

|                         |     |                                                                                                                                                   |                                                                                                                |
|-------------------------|-----|---------------------------------------------------------------------------------------------------------------------------------------------------|----------------------------------------------------------------------------------------------------------------|
| Numbers analysed        | 16  | For each group, number of participants (denominator) included in each analysis and whether the analysis was by original assigned groups           | Section:<br>Methods,<br>subsection<br>Analysis sets<br>in paragraph:<br>1-3                                    |
| Outcomes and estimation | 17a | For each primary and secondary outcome, results for each group, and the estimated effect size and its precision (such as 95% confidence interval) | Table 2                                                                                                        |
|                         | 17b | For binary outcomes, presentation of both absolute and relative effect sizes is recommended                                                       | Table 2 and in<br>S4 Results                                                                                   |
| Ancillary analyses      | 18  | Results of any other analyses performed, including subgroup analyses and adjusted analyses, distinguishing pre-specified from exploratory         | S4 Results<br>S5 Results                                                                                       |
| Harms                   | 19  | All important harms or unintended effects in each group (for specific guidance see CONSORT for harms)                                             | Section:<br>Results<br>Paragraph: 8<br>In addition to<br>the Abstract                                          |
| <b>Discussion</b>       |     |                                                                                                                                                   |                                                                                                                |
| Limitations             | 20  | Trial limitations, addressing sources of potential bias, imprecision, and, if relevant, multiplicity of analyses                                  | Section:<br>Discussion<br>Paragraph:<br>13-14<br>Abstract                                                      |
| Generalisability        | 21  | Generalisability (external validity, applicability) of the trial findings                                                                         | Section:<br>Discussion in<br>the second to<br>last<br>paragraph. It<br>is also<br>described in<br>the Abstract |
| Interpretation          | 22  | Interpretation consistent with results, balancing benefits and harms, and considering other relevant evidence                                     | Section:<br>Discussion                                                                                         |

---

Paragraph:  
1,2,3 in  
particular in  
addition to 6,  
7, 10,11,13,  
14-15.

---

## Other information

Registration 23 Registration number and name of trial registry

Section:  
Methods,  
subsection  
Study design  
Subsection  
paragraph: 2

Protocol 24 Where the full trial protocol can be accessed, if available

---

S1 Study  
Protocol and  
in published  
paper  
DOI: [10.1371/journal.pone.0276613](https://doi.org/10.1371/journal.pone.0276613)

---

Funding 25 Sources of funding and other support (such as supply of drugs), role of funders

Role of the  
founding  
source is  
reported in  
separate  
document  
upon addition  
to PLOS MED

---

\*We strongly recommend reading this statement in conjunction with the CONSORT 2010 Explanation and Elaboration for important clarifications on all the items. If relevant, we also recommend reading CONSORT extensions for cluster randomised trials, non-inferiority and equivalence trials, non-pharmacological treatments, herbal interventions, and pragmatic trials. Additional extensions are forthcoming: for those and for up to date references relevant to this checklist, see [www.consort-statement.org](http://www.consort-statement.org).
