# Supplementary material for: The effect of intravenous hyoscine butylbromide on slow progress in labor (BUSCLAB): A double-blind randomized placebo-controlled trial
Source: PubMed Central journal article supplement (PMC11008832; doi:10.1371/journal.pmed.1004352), 2024-03-28
Supplement: pmed.1004352.s004.pdf [file pmed.1004352.s004.pdf]

|                                                          | STUDY PERIOD     |                                                              |                           |                           |                       |                                 |                      |
|----------------------------------------------------------|------------------|--------------------------------------------------------------|---------------------------|---------------------------|-----------------------|---------------------------------|----------------------|
| TIME                                                     | Screening Period | Delivery                                                     |                           |                           | End of postnatal stay |                                 | Follow-up evaluation |
| Time point                                               |                  | Baseline (≥3cm and < 10 cm dilation) Crossing the alert line | <sup>a</sup> IMP is given | 30 min after IMP is given | Day of delivery       | Day of discharge                | 1 month postpartum   |
| <b>ENROLMENT:</b>                                        |                  |                                                              |                           |                           |                       |                                 |                      |
| Informed consent                                         | X                |                                                              |                           |                           |                       |                                 |                      |
| Inclusion/exclusion Evaluation                           | X                |                                                              |                           |                           |                       |                                 |                      |
| Medical History                                          | X                |                                                              |                           |                           |                       |                                 |                      |
| Concomitant Medication                                   | X                | X                                                            |                           |                           |                       |                                 |                      |
| <sup>b</sup> Physical Examination fetus (CTG)            |                  | X                                                            | X                         | X                         |                       |                                 |                      |
| <sup>c</sup> Vital signs mother                          |                  | X                                                            | X                         |                           | X                     | X                               |                      |
| Cervical dilation                                        |                  | X                                                            |                           |                           |                       |                                 |                      |
| <sup>d</sup> Pain measurement (VAS)                      |                  |                                                              | X                         | X                         |                       |                                 |                      |
| <b>INTERVENTIONS:</b>                                    |                  |                                                              |                           |                           |                       |                                 |                      |
| Treatment administration                                 |                  |                                                              | X                         |                           |                       |                                 |                      |
| <b>ASSESSMENTS:</b>                                      |                  |                                                              |                           |                           |                       |                                 |                      |
| Adverse event, mother                                    |                  |                                                              | X                         | X                         | X                     | X                               |                      |
| Adverse event, newborn/fetus                             |                  |                                                              | X                         | X                         | X                     | X                               |                      |
| <sup>e</sup> Physical Examination newborn (pediatrician) |                  |                                                              |                           |                           |                       | 1 <sup>st</sup> day post partum |                      |
| Childbirth Experience Questionnaire                      |                  |                                                              |                           |                           |                       |                                 | X                    |
